# Supplementary material for: Designing triazatruxene-based donor materials with promising photovoltaic parameters for organic solar cells
Source: Royal Society of Chemistry journal article supplement (doi:10.1039/c9ra03856f), 2019-01-01
Supplement: c9ra03856f1.pdf [file c9ra03856f1.pdf]

## Designing Triazatruxene-based Donor Materials with Promising Photovoltaic Parameters for Organic Solar Cells

Muhammad Usman Khan,<sup>a</sup> Javed Iqbal,<sup>\*b,c</sup> Muhammad Khalid,<sup>\*d</sup> Riaz Hussain,<sup>e</sup> Ataulpa Albert Carmo Braga,<sup>f</sup> Munawar Hussain<sup>d</sup> and Shabbir Muhammad<sup>g</sup>

<sup>a</sup>Department of Applied Chemistry, Government College University, Faisalabad-38000, Pakistan

<sup>b</sup>Department of Chemistry, University of Agriculture, Faisalabad-38000, Pakistan

<sup>c</sup>Punjab Bio-energy Institute, University of Agriculture, Faisalabad-38040, Pakistan

<sup>d</sup>Department of Chemistry, Khwaja Fareed University of Engineering & Information Technology, Rahim Yar Khan-64200, Pakistan

<sup>e</sup>Department of Chemistry, University of Okara, Okara-56300, Pakistan

<sup>f</sup>Departamento de Química Fundamental, Instituto de Química, Universidade de São Paulo, Avenida Professor Lineu Prestes, 748, São Paulo 05508-000, Brazil

<sup>g</sup>Department of Physics, College of Science, King Khalid University, Abha 61413, P.O. Box 9004, Saudi Arabia

\* Corresponding authors E-mail addresses:

(Dr. Javed Iqbal) [Javedkhattak79@gmail.com](mailto:Javedkhattak79@gmail.com)

(Dr. Muhammad Khalid) [khalid@iq.usp.br](mailto:khalid@iq.usp.br); [muhammad.khalid@kfueit.edu.pk](mailto:muhammad.khalid@kfueit.edu.pk)

### Optimized Cartesian Co-ordinates of compounds

#### Reference Molecule (R)

| Symbol | X          | Y           | Z           |
|--------|------------|-------------|-------------|
| C      | 7.92744700 | -1.03169600 | 0.14824400  |
| C      | 6.85093600 | -1.89021800 | -0.18584600 |
| C      | 7.15407000 | -3.16334500 | -0.69389200 |
| C      | 8.47770200 | -3.57893100 | -0.77632600 |
| C      | 9.52123400 | -2.73511800 | -0.37741100 |
| C      | 9.25756500 | -1.44586800 | 0.07024400  |
| N      | 7.43572800 | 0.23195800  | 0.47510100  |

|   |             |             |             |
|---|-------------|-------------|-------------|
| C | 6.04788400  | 0.20631400  | 0.34773700  |
| C | 5.64210100  | -1.10755300 | -0.01399500 |
| C | 5.11480000  | 1.27253000  | 0.43495400  |
| C | 3.81261800  | 1.03088000  | -0.07159800 |
| C | 3.33078100  | -0.28294600 | -0.28389000 |
| C | 4.25871000  | -1.34809700 | -0.18413900 |
| C | 5.12419500  | 2.65910700  | 0.87814600  |
| C | 3.89059800  | 3.22050800  | 0.45563000  |
| N | 3.10780400  | 2.23334000  | -0.13949000 |
| C | 2.01475700  | -0.88522300 | -0.41234400 |
| C | 2.22400400  | -2.28866700 | -0.41261800 |
| N | 3.57862500  | -2.56493400 | -0.26725000 |
| C | 0.69746800  | -0.41299300 | -0.41454400 |
| C | -0.38378900 | -1.30194500 | -0.48006300 |
| C | -0.13008100 | -2.68792200 | -0.53162000 |
| C | 1.16193500  | -3.18917400 | -0.48521800 |
| C | 5.96149300  | 3.45036600  | 1.67948400  |
| C | 5.62623900  | 4.77563600  | 1.93583800  |
| C | 4.44995600  | 5.33297900  | 1.42165300  |
| C | 3.56239700  | 4.55533800  | 0.68562300  |
| C | 4.00823600  | -3.80550900 | 0.39115800  |
| C | 3.63982900  | -3.86120000 | 1.87719600  |
| C | 2.13747500  | 2.55802600  | -1.19063100 |
| C | 2.77528900  | 3.19399600  | -2.43038600 |
| C | 8.28735600  | 1.41147800  | 0.30038700  |
| C | 8.50310800  | 1.79229500  | -1.16744200 |
| H | 6.37696300  | -3.81308000 | -1.07258900 |

|   |             |             |             |
|---|-------------|-------------|-------------|
| H | 8.70417800  | -4.56294100 | -1.17023700 |
| H | 10.54725400 | -3.07837800 | -0.44223600 |
| H | 10.07131300 | -0.78283100 | 0.33650300  |
| H | 0.49082000  | 0.64032500  | -0.29374700 |
| H | -0.95966100 | -3.37861300 | -0.62220200 |
| H | 1.33182400  | -4.25859300 | -0.50626200 |
| H | 6.84238500  | 3.03503100  | 2.14977900  |
| H | 6.27742100  | 5.37837800  | 2.55823700  |
| H | 4.20975700  | 6.36978900  | 1.62664200  |
| H | 2.62569400  | 4.97123600  | 0.33428000  |
| H | 3.56403800  | -4.64355600 | -0.15158200 |
| H | 5.08285800  | -3.89636200 | 0.28661900  |
| H | 3.99268100  | -4.80171200 | 2.30918400  |
| H | 4.11263400  | -3.04016200 | 2.42063600  |
| H | 2.56067300  | -3.79884700 | 2.02913200  |
| H | 1.64199900  | 1.63762600  | -1.48279600 |
| H | 1.37444400  | 3.21783800  | -0.76681500 |
| H | 2.00446400  | 3.39826000  | -3.17879300 |
| H | 3.27557600  | 4.13404900  | -2.19155800 |
| H | 3.50909900  | 2.51717800  | -2.87412400 |
| H | 7.84495500  | 2.24582900  | 0.83029200  |
| H | 9.24083800  | 1.20200100  | 0.78957900  |
| H | 9.15141800  | 2.67056200  | -1.23163400 |
| H | 8.97056600  | 0.97907100  | -1.72630600 |
| H | 7.55215600  | 2.03806300  | -1.64501100 |
| C | -1.77328100 | -0.79433400 | -0.47928200 |
| C | -2.11890200 | 0.39857600  | -1.13727400 |

|   |              |             |             |
|---|--------------|-------------|-------------|
| C | -2.80212000  | -1.48784300 | 0.18332200  |
| C | -3.41991600  | 0.87081100  | -1.12867600 |
| H | -1.36070700  | 0.94351700  | -1.68675800 |
| C | -4.10526500  | -1.01979400 | 0.19181800  |
| H | -2.56720000  | -2.39646100 | 0.72448700  |
| C | -4.45221900  | 0.17704800  | -0.46567200 |
| H | -3.65879200  | 1.78886300  | -1.65490200 |
| H | -4.85178600  | -1.59156100 | 0.72707800  |
| C | -5.78391900  | 0.74183200  | -0.51125900 |
| C | -6.95938700  | 0.32373400  | 0.01057300  |
| H | -5.87699700  | 1.67378700  | -1.06415400 |
| C | -8.18631500  | 1.12078300  | -0.20142100 |
| S | -7.33540800  | -1.11071400 | 0.97437300  |
| N | -9.28073800  | 0.49758900  | 0.43659900  |
| O | -8.29098500  | 2.16520200  | -0.80447100 |
| C | -9.04939400  | -0.68289500 | 1.09687100  |
| C | -10.60506000 | 1.05546400  | 0.27900400  |
| S | -10.14591900 | -1.59758000 | 1.91444000  |
| C | -11.33126100 | 0.44715600  | -0.92924200 |
| H | -11.17571700 | 0.87886200  | 1.19275000  |
| H | -10.48846300 | 2.12924900  | 0.11283700  |
| O | -10.82492000 | -0.29169300 | -1.71667600 |
| O | -12.61905700 | 0.84688100  | -1.05838300 |
| H | -12.88131900 | 1.41596500  | -0.32437400 |

**M1**

| <b>Symbol</b> | <b>X</b>    | <b>Y</b>    | <b>Z</b>    |
|---------------|-------------|-------------|-------------|
| C             | 8.46283100  | -0.92631800 | -0.02231900 |
| C             | 7.39945800  | -1.81859200 | -0.30578400 |
| C             | 7.71845800  | -3.08218800 | -0.82779400 |
| C             | 9.04913800  | -3.45630700 | -0.97137200 |
| C             | 10.08306600 | -2.57976300 | -0.62094800 |
| C             | 9.80025600  | -1.29874900 | -0.16176600 |
| N             | 7.94763600  | 0.32206200  | 0.32636900  |
| C             | 6.55739600  | 0.25339600  | 0.26441400  |
| C             | 6.17609800  | -1.07363400 | -0.07775000 |
| C             | 5.59686700  | 1.29025100  | 0.39633200  |
| C             | 4.28068200  | 1.00821500  | -0.04903500 |
| C             | 3.83089200  | -0.32056400 | -0.23790000 |
| C             | 4.79457100  | -1.35643300 | -0.18144200 |
| C             | 5.58358200  | 2.67679300  | 0.84013000  |
| C             | 4.31464000  | 3.19888000  | 0.47667200  |
| N             | 3.53595600  | 2.18733700  | -0.08279600 |
| C             | 2.52976700  | -0.96287100 | -0.30153200 |
| C             | 2.78147700  | -2.36040100 | -0.30871100 |
| N             | 4.14731100  | -2.59410000 | -0.22844600 |
| C             | 1.20131700  | -0.53089600 | -0.24089600 |
| C             | 0.14479700  | -1.45313700 | -0.25018100 |
| C             | 0.43778000  | -2.83185600 | -0.30984900 |
| C             | 1.74457600  | -3.29321600 | -0.32713400 |
| C             | 6.43247400  | 3.49406400  | 1.60227200  |
| C             | 6.06780300  | 4.80791400  | 1.87592500  |

|   |             |             |             |
|---|-------------|-------------|-------------|
| C | 4.85145600  | 5.32764600  | 1.41851300  |
| C | 3.95523000  | 4.52251400  | 0.72396000  |
| C | 4.64842700  | -3.82239600 | 0.40221200  |
| C | 4.36028900  | -3.89093300 | 1.90525200  |
| C | 2.51021800  | 2.48188100  | -1.08984300 |
| C | 3.07245900  | 3.13738000  | -2.35563100 |
| C | 8.75425500  | 1.52725200  | 0.11542700  |
| C | 8.89603700  | 1.91187900  | -1.36036300 |
| H | 6.94568700  | -3.75629600 | -1.17111900 |
| H | 9.28785900  | -4.43313900 | -1.37569400 |
| H | 11.11518600 | -2.89089900 | -0.73320800 |
| H | 10.60425500 | -0.61014500 | 0.06634200  |
| H | 0.97081100  | 0.51634000  | -0.11186300 |
| H | -0.37306300 | -3.54832200 | -0.35929900 |
| H | 1.94570300  | -4.35694900 | -0.35522200 |
| H | 7.34716800  | 3.10687300  | 2.03009200  |
| H | 6.72800700  | 5.43109500  | 2.46788200  |
| H | 4.58836300  | 6.35619900  | 1.63634000  |
| H | 2.99032500  | 4.90866200  | 0.41803000  |
| H | 4.20197300  | -4.67250300 | -0.11943100 |
| H | 5.71823000  | -3.88005300 | 0.24103600  |
| H | 4.76423100  | -4.82047600 | 2.31552800  |
| H | 4.83541700  | -3.05628600 | 2.42535900  |
| H | 3.28917200  | -3.86234700 | 2.11387900  |
| H | 2.03148000  | 1.54625500  | -1.36139400 |
| H | 1.74672100  | 3.11771300  | -0.63173200 |
| H | 2.26332000  | 3.31743500  | -3.06888900 |

|   |              |             |             |
|---|--------------|-------------|-------------|
| H | 3.55264900   | 4.09278000  | -2.13766400 |
| H | 3.80709100   | 2.48419200  | -2.83223200 |
| H | 8.30853100   | 2.34825600  | 0.66299100  |
| H | 9.73342700   | 1.34832800  | 0.56433200  |
| H | 9.51391000   | 2.80938000  | -1.45204900 |
| H | 9.36418100   | 1.11256500  | -1.93834800 |
| H | 7.91880400   | 2.12789800  | -1.79755900 |
| C | -1.25504800  | -0.98874400 | -0.18330400 |
| C | -1.66114600  | 0.21366700  | -0.79070600 |
| C | -2.23741600  | -1.72726800 | 0.50373200  |
| C | -2.97142900  | 0.64635000  | -0.71810500 |
| H | -0.94135300  | 0.80028400  | -1.34812400 |
| C | -3.55252700  | -1.30340200 | 0.57131300  |
| H | -1.95267800  | -2.63352900 | 1.02400000  |
| C | -3.96412500  | -0.10457600 | -0.04921900 |
| H | -3.25335900  | 1.57678100  | -1.19884700 |
| H | -4.24713800  | -1.89680100 | 1.14941200  |
| C | -5.30220400  | 0.43957900  | -0.05057900 |
| C | -6.49628500  | -0.09950000 | 0.32524900  |
| H | -5.34470900  | 1.44190300  | -0.45095900 |
| C | -7.80297400  | 0.55497000  | 0.27631100  |
| S | -6.70992900  | -1.78600800 | 0.83746300  |
| N | -8.82714100  | -0.36725000 | 0.46676900  |
| C | -8.44745000  | -1.66559100 | 0.80187900  |
| C | -10.24405600 | -0.09731500 | 0.22541500  |
| S | -9.43405000  | -2.93667300 | 1.14722700  |
| C | -10.52959100 | 0.06941600  | -1.27695700 |

|   |              |             |             |
|---|--------------|-------------|-------------|
| H | -10.77586600 | -0.99923400 | 0.54115000  |
| H | -10.59337300 | 0.72244700  | 0.84427500  |
| O | -9.94092500  | -0.56169600 | -2.10526100 |
| O | -11.54697500 | 0.89230400  | -1.58706600 |
| H | -11.69140100 | 1.54847700  | -0.88814500 |
| C | -8.02455900  | 1.92617200  | 0.11738100  |
| C | -6.97641900  | 2.87600200  | -0.02495500 |
| N | -6.16954800  | 3.69781200  | -0.14115200 |
| C | -9.29913600  | 2.55361300  | 0.12809700  |
| N | -10.32340100 | 3.09442900  | 0.13872000  |

## M2

| Symbol | X           | Y           | Z           |
|--------|-------------|-------------|-------------|
| C      | 8.76829500  | -0.75138200 | 0.18233900  |
| C      | 7.75641400  | -1.67189600 | -0.18632300 |
| C      | 8.15078100  | -2.90533600 | -0.72857600 |
| C      | 9.50050700  | -3.22594600 | -0.81042100 |
| C      | 10.48005800 | -2.32429600 | -0.37720600 |
| C      | 10.12450200 | -1.07014100 | 0.10493300  |
| N      | 8.18791700  | 0.46519500  | 0.54084600  |
| C      | 6.80663300  | 0.34814200  | 0.40062300  |
| C      | 6.49511600  | -0.97987300 | -0.00273100 |
| C      | 5.80140900  | 1.34448400  | 0.51122400  |
| C      | 4.52275300  | 1.02895800  | -0.01365600 |
| C      | 4.13467800  | -0.30832200 | -0.26772300 |
| C      | 5.13300000  | -1.30958600 | -0.19071900 |
| C      | 5.71132500  | 2.71464300  | 0.99536000  |



|   |             |             |             |
|---|-------------|-------------|-------------|
| C | 4.44470000  | 3.20155300  | 0.57888100  |
| N | 3.73616900  | 2.18066900  | -0.05223100 |
| C | 2.86436000  | -0.99533700 | -0.42245700 |
| C | 3.16957700  | -2.38149100 | -0.45955400 |
| N | 4.53748200  | -2.56777200 | -0.31191300 |
| C | 1.51858400  | -0.61474200 | -0.42068900 |
| C | 0.50034600  | -1.57404900 | -0.51670900 |
| C | 0.84899400  | -2.93803200 | -0.60432100 |
| C | 2.17175400  | -3.35035200 | -0.56408400 |
| C | 6.48604000  | 3.53745100  | 1.82733000  |
| C | 6.05742500  | 4.82773400  | 2.11991300  |
| C | 4.84865200  | 5.31735300  | 1.61210900  |
| C | 4.02246600  | 4.50268100  | 0.84550700  |
| C | 5.04988300  | -3.79649800 | 0.30901800  |
| C | 4.68441900  | -3.92256100 | 1.79136200  |
| C | 2.75581900  | 2.46945700  | -1.10472400 |
| C | 3.35991600  | 3.18392600  | -2.31831800 |
| C | 8.95845700  | 1.70509800  | 0.41330000  |
| C | 9.16274200  | 2.14593700  | -1.03925800 |
| H | 7.42374300  | -3.59561400 | -1.13400600 |
| H | 9.79758700  | -4.17978200 | -1.23066200 |
| H | 11.52779900 | -2.59390000 | -0.44219200 |
| H | 10.88832800 | -0.36064200 | 0.39785500  |
| H | 1.24096700  | 0.41833300  | -0.27121200 |
| H | 0.07037100  | -3.68206900 | -0.71996900 |
| H | 2.41473700  | -4.40452900 | -0.61375100 |
| H | 7.39035100  | 3.17032600  | 2.29316600  |

|   |             |             |             |
|---|-------------|-------------|-------------|
| H | 6.66059300  | 5.45512100  | 2.76581900  |
| H | 4.53538300  | 6.32821200  | 1.84583700  |
| H | 3.06144400  | 4.86299300  | 0.49852100  |
| H | 4.66412800  | -4.64522100 | -0.26104000 |
| H | 6.12819700  | -3.81087600 | 0.20482800  |
| H | 5.09934100  | -4.85006200 | 2.19524500  |
| H | 5.10037500  | -3.08891500 | 2.36135900  |
| H | 3.60335500  | -3.93778200 | 1.94197800  |
| H | 2.32746500  | 1.52624400  | -1.42901900 |
| H | 1.94558700  | 3.06302600  | -0.67066300 |
| H | 2.58375400  | 3.35824700  | -3.06876500 |
| H | 3.79286000  | 4.14801300  | -2.04631500 |
| H | 4.14203600  | 2.57213900  | -2.77377300 |
| H | 8.45426500  | 2.48997600  | 0.96309800  |
| H | 9.91879400  | 1.54573600  | 0.90787800  |
| H | 9.74996700  | 3.06790400  | -1.06801000 |
| H | 9.69069100  | 1.38480200  | -1.61725900 |
| H | 8.20224700  | 2.34148200  | -1.52094000 |
| C | -0.91821400 | -1.16168700 | -0.50931800 |
| C | -1.33707500 | 0.03649600  | -1.11697100 |
| C | -1.90748500 | -1.95712900 | 0.09859800  |
| C | -2.66522900 | 0.42063800  | -1.10490000 |
| H | -0.61216900 | 0.65370100  | -1.63353200 |
| C | -3.23732200 | -1.57428500 | 0.11759100  |
| H | -1.62168400 | -2.88290000 | 0.58281200  |
| C | -3.65375600 | -0.36306100 | -0.47210800 |
| H | -2.95873200 | 1.34371700  | -1.59364500 |

|   |              |             |             |
|---|--------------|-------------|-------------|
| H | -3.95787200  | -2.23925800 | 0.57576800  |
| C | -5.01434500  | 0.11924000  | -0.49058000 |
| C | -6.09220800  | -0.24661100 | 0.25377800  |
| H | -5.19078200  | 0.93384700  | -1.18522400 |
| C | -7.40704700  | 0.36728600  | 0.12810000  |
| S | -6.05191300  | -1.27192100 | 1.69756700  |
| N | -8.14123700  | 0.19722100  | 1.29534800  |
| C | -7.59113000  | -0.64900700 | 2.25751000  |
| C | -9.51873900  | 0.65713800  | 1.45995200  |
| S | -8.24134300  | -1.06855300 | 3.70801800  |
| C | -10.48396000 | -0.11467000 | 0.54054800  |
| H | -9.80130400  | 0.40594500  | 2.48491200  |
| H | -9.57252000  | 1.73537800  | 1.34685500  |
| O | -10.39373500 | -1.29691100 | 0.38008900  |
| O | -11.48478300 | 0.61060300  | 0.01156100  |
| H | -11.25069800 | 1.55253900  | -0.02567700 |
| C | -7.84669300  | 1.06737300  | -0.99557200 |
| C | -8.82125900  | 2.09000200  | -0.91129800 |
| N | -9.63163600  | 2.91308000  | -0.80853400 |
| C | -7.39812300  | 0.81519300  | -2.39722200 |
| O | -7.45689900  | 1.64613900  | -3.27187200 |
| O | -7.01319300  | -0.45909500 | -2.60087000 |
| C | -6.60800900  | -0.77560400 | -3.94554000 |
| H | -5.75397300  | -0.16519100 | -4.24419200 |
| H | -6.33830600  | -1.82873500 | -3.92282700 |
| H | -7.43027900  | -0.60260000 | -4.64048700 |

**M3**

| <b>Symbol</b> | <b>X</b>    | <b>Y</b>    | <b>Z</b>    |
|---------------|-------------|-------------|-------------|
| C             | 9.49964200  | -0.56939600 | 0.01911300  |
| C             | 8.51784500  | -1.57788200 | -0.14358000 |
| C             | 8.94516600  | -2.86283200 | -0.51385900 |
| C             | 10.30327800 | -3.13511700 | -0.62698000 |
| C             | 11.25721900 | -2.13670200 | -0.39609700 |
| C             | 10.86429600 | -0.83901000 | -0.09014800 |
| N             | 8.87767200  | 0.66237200  | 0.22211300  |
| C             | 7.49828600  | 0.46649400  | 0.18351800  |
| C             | 7.23439800  | -0.91972600 | 0.00707800  |
| C             | 6.45049800  | 1.42424900  | 0.19863400  |
| C             | 5.16413300  | 0.97640300  | -0.19554400 |
| C             | 4.83192300  | -0.39926100 | -0.21840000 |
| C             | 5.88290500  | -1.33275100 | -0.04785000 |
| C             | 6.31569500  | 2.84810100  | 0.47054400  |
| C             | 5.00598300  | 3.20971500  | 0.05910800  |
| N             | 4.31923500  | 2.07381400  | -0.36481200 |
| C             | 3.59192300  | -1.15595700 | -0.19258600 |
| C             | 3.96557300  | -2.51615500 | -0.03540500 |
| N             | 5.34809700  | -2.61861600 | 0.05889100  |
| C             | 2.22973400  | -0.83776900 | -0.17210600 |
| C             | 1.25907200  | -1.84309300 | -0.06293900 |
| C             | 1.67240300  | -3.18747500 | 0.04004600  |
| C             | 3.01515500  | -3.53143400 | 0.06752000  |
| C             | 7.08916600  | 3.82328200  | 1.11868400  |
| C             | 6.61097500  | 5.12423300  | 1.23373300  |

|   |             |             |             |
|---|-------------|-------------|-------------|
| C | 5.35422300  | 5.47655300  | 0.72865300  |
| C | 4.53230100  | 4.51750300  | 0.14664000  |
| C | 5.95287300  | -3.71084700 | 0.83248800  |
| C | 5.66771600  | -3.61829000 | 2.33488200  |
| C | 3.27074500  | 2.15215000  | -1.38787300 |
| C | 3.77170300  | 2.69474200  | -2.73057600 |
| C | 9.57586300  | 1.89867400  | -0.13989500 |
| C | 9.67821900  | 2.11758200  | -1.65240300 |
| H | 8.23341700  | -3.63747800 | -0.76445900 |
| H | 10.62583100 | -4.12925300 | -0.91397000 |
| H | 12.31244100 | -2.36867500 | -0.48226300 |
| H | 11.60553500 | -0.06116000 | 0.04470300  |
| H | 1.90634700  | 0.19279300  | -0.16742400 |
| H | 0.92702000  | -3.97221300 | 0.08472200  |
| H | 3.30916300  | -4.56909500 | 0.16607100  |
| H | 8.03388100  | 3.57232100  | 1.58142200  |
| H | 7.21400000  | 5.87006100  | 1.73850300  |
| H | 5.00221200  | 6.49737200  | 0.82185000  |
| H | 3.53749700  | 4.77782100  | -0.19456400 |
| H | 5.58383000  | -4.65461800 | 0.42351800  |
| H | 7.02417300  | -3.69485700 | 0.67117000  |
| H | 6.14903000  | -4.45215900 | 2.85319400  |
| H | 6.06780300  | -2.68826600 | 2.74468500  |
| H | 4.59752900  | -3.65608300 | 2.54670500  |
| H | 2.87620800  | 1.15217900  | -1.53780900 |
| H | 2.45426800  | 2.76965300  | -1.00155600 |
| H | 2.94947800  | 2.71345900  | -3.45138600 |

|   |             |             |             |
|---|-------------|-------------|-------------|
| H | 4.16516300  | 3.70831700  | -2.63662900 |
| H | 4.56133200  | 2.05539800  | -3.13206600 |
| H | 9.06325500  | 2.73751200  | 0.31420600  |
| H | 10.56866700 | 1.85820700  | 0.31287900  |
| H | 10.21614100 | 3.04733400  | -1.85723300 |
| H | 10.21122400 | 1.29838600  | -2.13923400 |
| H | 8.68430000  | 2.19659700  | -2.09809100 |
| C | -0.17856200 | -1.50004200 | -0.04175700 |
| C | -0.69149900 | -0.43668200 | -0.80622100 |
| C | -1.08722200 | -2.21773400 | 0.75768200  |
| C | -2.03667400 | -0.11707600 | -0.77817400 |
| H | -0.02639600 | 0.12711400  | -1.44910500 |
| C | -2.43595900 | -1.90744700 | 0.78101100  |
| H | -0.71897000 | -3.00794000 | 1.40066400  |
| C | -2.95464200 | -0.85571200 | -0.00192300 |
| H | -2.40318300 | 0.70484500  | -1.38366700 |
| H | -3.07776400 | -2.45816200 | 1.45621900  |
| C | -4.34480500 | -0.47021200 | -0.05510300 |
| C | -5.46203800 | -1.14630200 | 0.32231500  |
| H | -4.52096100 | 0.50501200  | -0.48899900 |
| C | -6.82120500 | -0.64197100 | 0.17093500  |
| S | -5.50254200 | -2.86525200 | 0.76409000  |
| N | -7.72907500 | -1.71373700 | 0.16049800  |
| C | -7.21797700 | -2.96911800 | 0.44688800  |
| C | -9.16756400 | -1.58907300 | -0.00683400 |
| S | -8.06029400 | -4.38666500 | 0.55846100  |
| C | -9.58008100 | -1.64253600 | -1.48386300 |

|   |              |             |             |
|---|--------------|-------------|-------------|
| H | -9.62303900  | -2.43205100 | 0.51785300  |
| H | -9.51533800  | -0.66520700 | 0.45354000  |
| O | -8.80821700  | -1.64154600 | -2.39439500 |
| O | -10.91582300 | -1.67507300 | -1.68548600 |
| H | -11.39772600 | -1.70281500 | -0.84945800 |
| C | -7.15817000  | 0.69877700  | 0.06031500  |
| C | -6.41883400  | 1.80291700  | 0.70406100  |
| C | -8.26514100  | 3.00795300  | -0.21087400 |
| O | -5.40248500  | 1.76525700  | 1.36958500  |
| S | -9.24928000  | 4.27600500  | -0.60531100 |
| S | -8.59221400  | 1.36696400  | -0.76028700 |
| N | -7.11383200  | 3.02509700  | 0.51840800  |
| C | -6.57889300  | 4.25008400  | 1.13481700  |
| C | -7.10695200  | 4.46500300  | 2.55184300  |
| H | -6.85483400  | 5.07773400  | 0.48234300  |
| H | -5.49538800  | 4.13635900  | 1.14234800  |
| H | -6.68492400  | 5.38550100  | 2.96320600  |
| H | -8.19448600  | 4.55904500  | 2.55457900  |
| H | -6.81609500  | 3.63765100  | 3.20186200  |

#### M4

| Symbol | X           | Y           | Z           |
|--------|-------------|-------------|-------------|
| C      | 9.74030600  | -0.62549900 | -0.03524400 |
| C      | 8.76577500  | -1.62760700 | -0.26595600 |
| C      | 9.20325300  | -2.88451100 | -0.71288200 |
| C      | 10.56360200 | -3.14140500 | -0.83379800 |
| C      | 11.50993300 | -2.15378300 | -0.53506500 |

|   |             |             |             |
|---|-------------|-------------|-------------|
| C | 11.10724500 | -0.87984400 | -0.15211700 |
| N | 9.10981800  | 0.58802900  | 0.23926900  |
| C | 7.73251400  | 0.38755100  | 0.18093700  |
| C | 7.47752300  | -0.98713400 | -0.08252200 |
| C | 6.67943800  | 1.33662300  | 0.25136400  |
| C | 5.39774000  | 0.90864500  | -0.17848900 |
| C | 5.07384600  | -0.46503400 | -0.28905700 |
| C | 6.12877600  | -1.40172500 | -0.16919200 |
| C | 6.53517600  | 2.73908500  | 0.61449200  |
| C | 5.22574400  | 3.11950200  | 0.22067300  |
| N | 4.54790200  | 2.00970600  | -0.28108900 |
| C | 3.83822900  | -1.22818500 | -0.31478500 |
| C | 4.21878000  | -2.59475100 | -0.23436600 |
| N | 5.59834300  | -2.69476500 | -0.13907100 |
| C | 2.47555400  | -0.91947000 | -0.28378400 |
| C | 1.50871800  | -1.93559500 | -0.23554700 |
| C | 1.92955900  | -3.28260900 | -0.20558700 |
| C | 3.27305300  | -3.61990400 | -0.19378700 |
| C | 7.30000500  | 3.67359300  | 1.32943700  |
| C | 6.81308900  | 4.96101900  | 1.52770400  |
| C | 5.55630000  | 5.33842500  | 1.04096000  |
| C | 4.74301000  | 4.41552700  | 0.39252200  |
| C | 6.20959600  | -3.83274200 | 0.56056600  |
| C | 5.92383100  | -3.84000800 | 2.06552600  |
| C | 3.50305500  | 2.14920200  | -1.30129400 |
| C | 4.00434500  | 2.78769300  | -2.60105200 |
| C | 9.80314400  | 1.84861300  | -0.04016100 |



|   |             |             |             |
|---|-------------|-------------|-------------|
| C | 9.91682300  | 2.15977000  | -1.53552100 |
| H | 8.49823200  | -3.64629400 | -1.01637000 |
| H | 10.89404200 | -4.11384500 | -1.17991900 |
| H | 12.56703000 | -2.37397800 | -0.62841100 |
| H | 11.84273800 | -0.10755200 | 0.03551100  |
| H | 2.14777400  | 0.10751700  | -0.21981300 |
| H | 1.18963900  | -4.07349800 | -0.20942600 |
| H | 3.57264700  | -4.65976400 | -0.15426400 |
| H | 8.24387300  | 3.39793000  | 1.77966800  |
| H | 7.40860500  | 5.67529600  | 2.08425100  |
| H | 5.19692700  | 6.34824400  | 1.20106900  |
| H | 3.74767300  | 4.69179000  | 0.06588600  |
| H | 5.84582800  | -4.74933100 | 0.08982100  |
| H | 7.28057600  | -3.79957100 | 0.40066700  |
| H | 6.41064700  | -4.70276900 | 2.52823600  |
| H | 6.31802600  | -2.93625900 | 2.53528200  |
| H | 4.85403100  | -3.89860400 | 2.27455000  |
| H | 3.11941000  | 1.15811100  | -1.52237000 |
| H | 2.67918000  | 2.73111200  | -0.87728400 |
| H | 3.18490600  | 2.84849600  | -3.32269700 |
| H | 4.38733100  | 3.79602100  | -2.43559800 |
| H | 4.80187400  | 2.18517700  | -3.04195400 |
| H | 9.28079000  | 2.65481600  | 0.45955600  |
| H | 10.79211200 | 1.78652500  | 0.41846300  |
| H | 10.45020500 | 3.10355000  | -1.67845300 |
| H | 10.45938700 | 1.37520500  | -2.06676600 |
| H | 8.92619700  | 2.25980600  | -1.98434300 |

|   |              |             |             |
|---|--------------|-------------|-------------|
| C | 0.07319600   | -1.60275900 | -0.20294600 |
| C | -0.43611100  | -0.47433800 | -0.87529100 |
| C | -0.84430200  | -2.39528500 | 0.51693000  |
| C | -1.78090400  | -0.16511000 | -0.83824100 |
| H | 0.23394500   | 0.14794300  | -1.45539100 |
| C | -2.19178700  | -2.09390100 | 0.55273100  |
| H | -0.48025500  | -3.23706100 | 1.09273500  |
| C | -2.70680800  | -0.97511100 | -0.14067700 |
| H | -2.14404700  | 0.70508200  | -1.37437700 |
| H | -2.83952000  | -2.70238700 | 1.16998000  |
| C | -4.08942700  | -0.59486700 | -0.17148200 |
| C | -5.21401700  | -1.28398900 | 0.19461300  |
| H | -4.28053500  | 0.39854000  | -0.56453900 |
| C | -6.54626100  | -0.73786300 | 0.10717700  |
| S | -5.29783100  | -3.01833300 | 0.54288600  |
| N | -7.50060400  | -1.74255100 | 0.15330600  |
| C | -7.03866500  | -3.03532500 | 0.36253100  |
| C | -8.93708300  | -1.51103400 | 0.21562000  |
| S | -7.96769100  | -4.38962000 | 0.49504800  |
| C | -9.62286200  | -1.85594300 | -1.11578900 |
| H | -9.33364300  | -2.10526700 | 1.03984200  |
| H | -9.11013700  | -0.45630000 | 0.43305100  |
| O | -9.08826300  | -1.71120200 | -2.17503700 |
| O | -10.90418900 | -2.25830200 | -1.01474500 |
| H | -11.13326200 | -2.46125700 | -0.09950100 |
| C | -6.85795800  | 0.61959100  | -0.09048400 |
| C | -6.26473100  | 1.75121300  | 0.55508700  |

|   |             |             |             |
|---|-------------|-------------|-------------|
| C | -7.42645000 | 2.82460200  | -1.19425900 |
| S | -7.97761300 | 4.03160700  | -2.18212400 |
| S | -7.94156600 | 1.16679600  | -1.39553200 |
| N | -6.53973200 | 2.93211500  | -0.13741300 |
| C | -6.08610600 | 4.28327700  | 0.26734600  |
| C | -7.00947400 | 4.93671300  | 1.29351600  |
| H | -6.07088200 | 4.86743900  | -0.65168300 |
| H | -5.06793800 | 4.20491000  | 0.63533000  |
| H | -6.61432100 | 5.92294800  | 1.54782300  |
| H | -8.01295300 | 5.06445300  | 0.88403500  |
| H | -7.06907700 | 4.35572900  | 2.21448500  |
| C | -5.72624300 | 0.52249500  | 2.60769900  |
| N | -5.80471200 | -0.41191200 | 3.28918500  |
| C | -4.83404900 | 2.70940900  | 2.39909400  |
| N | -4.15579800 | 3.49336300  | 2.91844200  |
| C | -5.62937700 | 1.69412600  | 1.81423900  |

## M5

| <b>Symbol</b> | <b>X</b>    | <b>Y</b>    | <b>Z</b>    |
|---------------|-------------|-------------|-------------|
| C             | 9.89485900  | -0.63438400 | 0.00527800  |
| C             | 8.93179800  | -1.65015100 | -0.21266500 |
| C             | 9.38545700  | -2.91428300 | -0.62157600 |
| C             | 10.74928100 | -3.16272800 | -0.71742600 |
| C             | 11.68342600 | -2.15992300 | -0.43104600 |
| C             | 11.26534100 | -0.88011800 | -0.08637500 |
| N             | 9.25091600  | 0.58053500  | 0.23962800  |
| C             | 7.87634700  | 0.36756200  | 0.16765600  |

|   |             |             |             |
|---|-------------|-------------|-------------|
| C | 7.63601500  | -1.01603500 | -0.06306800 |
| C | 6.81466800  | 1.30962200  | 0.19716200  |
| C | 5.54268000  | 0.85833700  | -0.23687000 |
| C | 5.23139600  | -0.52002200 | -0.31267000 |
| C | 6.29216800  | -1.44451300 | -0.15612300 |
| C | 6.65370000  | 2.72157200  | 0.51488900  |
| C | 5.34738100  | 3.07889800  | 0.08995900  |
| N | 4.68469400  | 1.94822500  | -0.38523200 |
| C | 4.00219700  | -1.29302400 | -0.33317800 |
| C | 4.39249600  | -2.65422100 | -0.21633700 |
| N | 5.77103700  | -2.74072500 | -0.10092200 |
| C | 2.63750600  | -0.99356700 | -0.32104200 |
| C | 1.67657500  | -2.01531900 | -0.26025500 |
| C | 2.10832700  | -3.35846900 | -0.19978300 |
| C | 3.45369500  | -3.68538700 | -0.16524300 |
| C | 7.40020300  | 3.68446500  | 1.21124800  |
| C | 6.90121700  | 4.97395100  | 1.36029300  |
| C | 5.64994900  | 5.32614100  | 0.84172600  |
| C | 4.85340400  | 4.37632400  | 0.21147600  |
| C | 6.38200700  | -3.85794900 | 0.63195500  |
| C | 6.07613400  | -3.83388300 | 2.13275000  |
| C | 3.65956200  | 2.04689100  | -1.43019300 |
| C | 4.18485900  | 2.63618600  | -2.74352700 |
| C | 9.93933100  | 1.83918700  | -0.05969400 |
| C | 10.07006600 | 2.11715500  | -1.56015100 |
| H | 8.69100800  | -3.68938900 | -0.91544700 |
| H | 11.09228200 | -4.14075800 | -1.03426700 |

|   |             |             |             |
|---|-------------|-------------|-------------|
| H | 12.74342700 | -2.37356600 | -0.50433500 |
| H | 11.99206400 | -0.09728400 | 0.09132700  |
| H | 2.30407100  | 0.03286100  | -0.28187300 |
| H | 1.37553900  | -4.15576100 | -0.19707500 |
| H | 3.76013000  | -4.72197000 | -0.10066500 |
| H | 8.33887600  | 3.43099500  | 1.68463000  |
| H | 7.48314900  | 5.71029100  | 1.90222700  |
| H | 5.28185600  | 6.33837700  | 0.96190600  |
| H | 3.86217500  | 4.63485900  | -0.14128900 |
| H | 6.03182300  | -4.78766500 | 0.17697300  |
| H | 7.45466400  | -3.81933100 | 0.48549100  |
| H | 6.56334300  | -4.68220200 | 2.62096900  |
| H | 6.45712100  | -2.91683300 | 2.58739100  |
| H | 5.00413700  | -3.89646000 | 2.32897200  |
| H | 3.27969000  | 1.04776800  | -1.62004500 |
| H | 2.82783600  | 2.64404300  | -1.04426100 |
| H | 3.37938200  | 2.66862500  | -3.48247700 |
| H | 4.56427900  | 3.65047400  | -2.60887500 |
| H | 4.99079000  | 2.01826900  | -3.14606200 |
| H | 9.40572000  | 2.65289000  | 0.41524100  |
| H | 10.92270400 | 1.79411500  | 0.41260600  |
| H | 10.59974600 | 3.06066200  | -1.71776800 |
| H | 10.62398000 | 1.32410400  | -2.06648800 |
| H | 9.08471800  | 2.20096300  | -2.02367100 |
| C | 0.23894700  | -1.69345600 | -0.24537900 |
| C | -0.27088800 | -0.56138000 | -0.91289800 |
| C | -0.68401500 | -2.50162600 | 0.45094700  |

|   |              |             |             |
|---|--------------|-------------|-------------|
| C | -1.61817200  | -0.26395500 | -0.89326500 |
| H | 0.40135600   | 0.07278700  | -1.47730300 |
| C | -2.03446100  | -2.21436000 | 0.46654400  |
| H | -0.32319100  | -3.34751000 | 1.02249800  |
| C | -2.54971600  | -1.09106500 | -0.22105700 |
| H | -1.98204500  | 0.60938200  | -1.42326500 |
| H | -2.68600000  | -2.84262000 | 1.05920600  |
| C | -3.93204500  | -0.72282600 | -0.28087500 |
| C | -5.06212400  | -1.41432800 | 0.07851800  |
| H | -4.12445400  | 0.26565300  | -0.68486300 |
| C | -6.38989000  | -0.88760800 | -0.06474400 |
| S | -5.15127000  | -3.13269700 | 0.49906000  |
| N | -7.34380700  | -1.86708700 | 0.04731100  |
| C | -6.89470600  | -3.15551900 | 0.32775200  |
| C | -8.77436300  | -1.59894700 | 0.07150100  |
| S | -7.83298300  | -4.49139500 | 0.52249000  |
| C | -9.43036700  | -1.93238000 | -1.27483100 |
| H | -9.20498500  | -2.17897400 | 0.88807200  |
| H | -8.91746400  | -0.53820900 | 0.28511100  |
| O | -8.83948800  | -1.89789600 | -2.31375800 |
| O | -10.74849300 | -2.20282000 | -1.21575600 |
| H | -11.04519900 | -2.29557400 | -0.30194900 |
| C | -6.70014500  | 0.47043000  | -0.34750600 |
| C | -6.20296500  | 1.55825600  | 0.38799200  |
| C | -7.14502500  | 2.68996300  | -1.44573900 |
| S | -7.58955600  | 3.92984800  | -2.44978200 |
| S | -7.58914800  | 1.02174200  | -1.78097000 |

|   |             |             |             |
|---|-------------|-------------|-------------|
| N | -6.43993400 | 2.76884900  | -0.26023200 |
| C | -6.26077900 | 4.09112600  | 0.38111900  |
| C | -7.44954400 | 4.46158100  | 1.26721400  |
| H | -6.15287500 | 4.80335700  | -0.43581900 |
| H | -5.32962600 | 4.06531400  | 0.93337300  |
| H | -7.27339400 | 5.44469800  | 1.71111300  |
| H | -8.37072800 | 4.51499100  | 0.68375400  |
| H | -7.58007100 | 3.74234400  | 2.07758700  |
| C | -5.70958900 | 1.42025100  | 1.72544900  |
| C | -6.34822000 | 0.45215900  | 2.53851200  |
| N | -6.92336800 | -0.33482800 | 3.16949600  |
| C | -4.51279200 | 2.03350300  | 2.28001000  |
| O | -4.15269600 | 1.97773900  | 3.43455900  |
| O | -3.74530100 | 2.64045300  | 1.30911800  |
| C | -2.52341700 | 3.22618900  | 1.78528600  |
| H | -2.72213700 | 3.96553300  | 2.56298200  |
| H | -1.86419900 | 2.45839400  | 2.19340700  |
| H | -2.06777700 | 3.69785100  | 0.91621600  |
